# Supplementary material for: Implementing International Law: The Worldwide Criminalization of Atrocities in Domestic Legal Systems, 1945-2010
Source: Springer Nature journal article supplement (doi:10.1007/s00702-016-1540-7), 2014-01-01
Supplement: MOESM1 [file 10029946]

# A candidate gene investigation of methylphenidate response in adult attention-deficit/hyperactivity disorder patients: results from a naturalistic study

Tor-Arne Hegvik, Kaya Kvarme Jacobsen, Mats Fredriksen, Tetyana Zayats, Jan Haavik

Corresponding author:

Tor-Arne Hegvik

Department of Biomedicine, University of Bergen, 5009 Bergen, Norway

K.G. Jebsen Centre for Research on Neuropsychiatric Disorders, University of Bergen, 5009 Bergen, Norway

E-mail address: [tahegvik@gmail.com](mailto:tahegvik@gmail.com)

Supplementary table 1. Description of the analysed genetic variants

| Gene               | SNP                  | Reference and reason for inclusion in this study                                                                                                                                                                                                                                                                                                                                                                                                                 |
|--------------------|----------------------|------------------------------------------------------------------------------------------------------------------------------------------------------------------------------------------------------------------------------------------------------------------------------------------------------------------------------------------------------------------------------------------------------------------------------------------------------------------|
| <i>GRM7</i>        | rs3792452            | One of the top SNPs in a GWAS on MPH effect in children where the G allele was associated with better a response to MPH (Mick et al. 2008). The SNP is located in a gene expressed in brain areas associated with ADHD and was therefore judged to be relevant by the authors of the study.                                                                                                                                                                      |
| <i>DRD5</i>        | 18.5 kb 5-prime VNTR | 148bp allele is over-transmitted in Turkish children who are MPH responders (Tahir et al. 2000) .                                                                                                                                                                                                                                                                                                                                                                |
| <i>LPHN3</i>       | rs6551665            | G allele has been associated with increased stimulant response in children (Arcos-Burgos et al. 2010), though in a later study in children it was associated with a worse MPH response (Labbe et al. 2012)                                                                                                                                                                                                                                                       |
| <i>LPHN3</i>       | rs6858066            | G allele has been associated with a good MPH response in children (Labbe et al. 2012)                                                                                                                                                                                                                                                                                                                                                                            |
| <i>LPHN3</i>       | rs2345039            | G allele has been associated with a poor MPH response in children (Labbe et al. 2012)                                                                                                                                                                                                                                                                                                                                                                            |
| <i>SLC6A3/DAT1</i> | rs2963238            | A allele has been associated with a good response to the antipsychotic clozapine in schizophrenia patients (Xu et al. 2010).                                                                                                                                                                                                                                                                                                                                     |
| <i>SLC6A3/DAT1</i> | rs2652511            | C allele has been associated with both child and adult ADHD (de Azeredo et al. 2014).                                                                                                                                                                                                                                                                                                                                                                            |
| <i>SLC6A3/DAT1</i> | 3'UTR VNTR           | A meta-analysis including both children and adults indicates that there are no, or possibly a minor effect from the 10-repeat allele (10R). The minor effect was noted in naturalistic studies where 10R homozygosity predicted a reduced effect from MPH on ADHD symptoms (Kambeitz et al. 2014).                                                                                                                                                               |
| <i>ADRA2A</i>      | rs1800544<br>(MspI)  | The G allele has been associated with increased improvement in inattentiveness in children and adolescents using MPH (da Silva et al. 2008) and symptomatically good response to MPH in children (Cheon et al. 2009). Though the results from both children and adults are conflicting (Contini et al. 2011; Kim et al. 2011; Park et al. 2013).                                                                                                                 |
| <i>ADRA2A</i>      | rs553668<br>(DraI)   | The variant has been shown to interact with the <i>DRD4</i> VNTR and affect the MPH response in children (Hong et al. 2012). However, the SNP alone has not been associated with changes in the MPH response in neither children or adults (Contini et al. 2011; Kim et al. 2011; Park et al. 2013)                                                                                                                                                              |
| <i>DRD4</i>        | Exon 3 VNTR          | 4-repeat allele has been associated with more favourable MPH dose-response curve in children (Froehlich et al. 2011) and conversely the 7-repeat allele has been shown to predict higher doses of MPH necessary for satisfactory response in children (Hamarman et al. 2004). The 4-repeat allele has also been associated with a good response to MPH in Korean children (Cheon et al. 2007). A study in adults has not shown any effect (Contini et al. 2012). |

|                                                                                                                                                                     |                    |                                                                                                                                                                                                                 |
|---------------------------------------------------------------------------------------------------------------------------------------------------------------------|--------------------|-----------------------------------------------------------------------------------------------------------------------------------------------------------------------------------------------------------------|
| <i>BDNF</i>                                                                                                                                                         | rs6265             | The G allele has been associated with a better response to MPH in Korean children (Kim et al. 2011).                                                                                                            |
| <i>BDNF</i>                                                                                                                                                         | rs61888800         | The G allele has been associated with antidepressant response in adults (Licinio et al. 2009) and the SNP is located in a gene affected by MPH administration (Amiri et al. 2013).                              |
| <i>SLC6A2/NET</i>                                                                                                                                                   | rs28386840         | T allele has been associated with a better MPH response in Korean children (Kim et al. 2010)                                                                                                                    |
| <i>SLC6A2/NET</i>                                                                                                                                                   | rs192303           | The SNP was nominally associated with MPH effect in a GWAS conducted in children (Mick et al. 2008) and is located in a key pharmacological target of MPH.                                                      |
| <i>CES1</i>                                                                                                                                                         | rs2244613          | CES1 is the main metabolizing enzyme of MPH (Sun et al. 2004) and the SNP has been associated with changes in serum concentrations of the anticoagulant dabigatran also metabolized by CES1 (Pare et al. 2013). |
| <i>SNAP25</i>                                                                                                                                                       | rs363020           | A candidate SNP that has not been shown to be associated with MPH response in adult ADHD, but was still labeled as a strong candidate in the same article (Contini et al. 2012).                                |
| <i>SNAP25</i>                                                                                                                                                       | rs3746544          | The T allele has been associated with better MPH dose-response in children (McGough et al. 2006). A study in adults has not shown any effect (Contini et al. 2012)                                              |
| <i>SNAP25</i>                                                                                                                                                       | rs1051312          | The T allele has been associated with worse MPH response in children (McGough et al. 2006)                                                                                                                      |
| <i>COMT</i>                                                                                                                                                         | rs4680 (Val158Met) | The G allele (Val) has been associated with a better response to MPH in children (Cheon et al. 2008; Kereszturi et al. 2008), though not in adults (Contini et al. 2012).                                       |
| SNP = Single nucleotide polymorphism, GWAS = Genome-wide association study, MPH = Methylphenidate, UTR = Untranslated region , VNTR = Variable number tandem repeat |                    |                                                                                                                                                                                                                 |

Supplementary table 2. Summary of the genotyping per genotyping method

| Genotyping platform                    | MPH responders | MPH non-responders | Total |
|----------------------------------------|----------------|--------------------|-------|
| Sequenom MassARRAY iPLEX               | 423            | 66                 | 489   |
| Illumina HumanExome BeadChip<br>12v1_B | 432            | 66                 | 498   |
| VNTR fragment analysis                 | 476            | 77                 | 553   |
| <i>Unique patients</i>                 | 487            | 77                 | 564   |
| VNTR = Variable number tandem repeat   |                |                    |       |

Supplementary table 3. Results from statistical analysis

| Gene                 | SNP                         | Risk allele | Observed frequency of risk allele | Additive model        |          | Dominant model              |              |
|----------------------|-----------------------------|-------------|-----------------------------------|-----------------------|----------|-----------------------------|--------------|
|                      |                             |             |                                   | OR (95% CI)           | p-value* | OR (95% CI)                 | p-value*     |
| <i>GRM7</i>          | rs3792452                   | A           | 0.144                             | 0.814 (0.490 -1.354)  | 0.428    | 0.706 (0.403 - 1.236)       | 0.223        |
| <i>DRD5</i>          | 18.5 kb 5-prime VNTR        | 148bp       | 0.521                             | 0.971 (0.690 -1.365)  | 0.864    | 1.190 (0.682 -2.075)        | 0.540        |
| <i>LPHN3</i>         | rs6551665                   | G           | 0.397                             | 1.037 (0.711 -1.511)  | 0.851    | 1.100 (0.641 - 1.888)       | 0.730        |
| <i>LPHN3</i>         | rs6858066                   | A           | 0.491                             | 1.188 (0.820 -1.722)  | 0.363    | 1.187 (0.664 -2.124)        | 0.563        |
| <i>LPHN3</i>         | rs2345039                   | G           | 0.423                             | 0.945 (0.650 -1.375)  | 0.768    | 0.813 (0.457 -1.444)        | 0.479        |
| <i>SLC6A3/DAT1</i>   | rs2963238                   | A           | 0.456                             | 0.984 (0.671 - 1.441) | 0.933    | 1.092 (0.617 -1.933)        | 0.763        |
| <i>SLC6A3/DAT1</i>   | rs2652511                   | T           | 0.454                             | 1.039 (0.711 -1.518)  | 0.845    | 1.220 (0.698 -2.132)        | 0.485        |
| <i>SLC6A3/DAT1</i>   | 3'UTR VNTR                  | 10 repeat   | 0.706                             | 1.077 (0.747 -1.554)  | 0.690    | 0.772 (0.315 -1.893)        | 0.572        |
| <b><i>ADRA2A</i></b> | <b>rs1800544<br/>(MspI)</b> | <b>G</b>    | <b>0.274</b>                      | 0.728 (0.482 -1.100)  | 0.131    | <b>0.560 (0.329 -0.953)</b> | <b>0.033</b> |
| <i>ADRA2A</i>        | rs553668<br>(DRAI)          | T           | 0.181                             | 0.719 (0.441 -1.173)  | 0.186    | 0.628 (0.368 -1.072)        | 0.088        |
| <i>DRD4</i>          | Exon 3 VNTR                 | 7 repeat    | 0.193                             | 0.983 (0.630 -1.534)  | 0.939    | 1.093 (0.652 -1.834)        | 0.736        |
| <i>BDNF</i>          | rs6265                      | A           | 0.194                             | 1.159 (0.718 -1.872)  | 0.546    | 1.071 (0.615 -1.865)        | 0.808        |
| <i>BDNF</i>          | rs61888800                  | T           | 0.289                             | 0.785 (0.530 -1.160)  | 0.224    | 0.876 (0.518 -1.482)        | 0.621        |
| <i>SLC6A2/NET</i>    | rs28386840                  | T           | 0.240                             | 1.377 (0.861 -2.203)  | 0.181    | 1.402 (0.812 -2.420)        | 0.226        |
| <i>SLC6A2/NET</i>    | rs192303                    | C           | 0.309                             | 0.988 (0.666 -1.466)  | 0.954    | 0.791 (0.466 -1.342)        | 0.384        |
| <i>CES1</i>          | rs2244613                   | C           | 0.188                             | 0.970 (0.611 -1.539)  | 0.897    | 1.057 (0.603 - 1.855)       | 0.846        |
| <i>SNAP25</i>        | rs363020                    | T           | 0.129                             | 1.565 (0.846 -2.897)  | 0.154    | 1.669 (0.837 -3.325)        | 0.146        |
| <i>SNAP25</i>        | rs3746544                   | C           | 0.338                             | 0.934 (0.638 -1.368)  | 0.726    | 0.913 (0.536 -1.555)        | 0.738        |

|                                                                                                                                |           |   |       |                      |       |                      |       |
|--------------------------------------------------------------------------------------------------------------------------------|-----------|---|-------|----------------------|-------|----------------------|-------|
|                                                                                                                                |           |   |       |                      |       |                      |       |
| <i>SNAP25</i>                                                                                                                  | rs1051312 | C | 0.306 | 0.946 (0.634 -1.412) | 0.785 | 0.915 (0.542 -1.545) | 0.740 |
| <i>COMT</i>                                                                                                                    | rs4680    | G | 0.465 | 1.315 (0.906 -1.908) | 0.150 | 1.072 (0.606 -1.896) | 0.812 |
| *p-values presented are uncorrected. The Bonferroni corrected significance threshold is $p = 0.00125$ .                        |           |   |       |                      |       |                      |       |
| SNP = Single Nucleotide Polymorphism, OR = Odds ratio, VNTR = Variable Number Tandem Repeat, 95% CI = 95% confidence interval. |           |   |       |                      |       |                      |       |
| OR > 1 means that the variant is associated with MPH response and OR < 1 that the variant is associated with MPH non-response. |           |   |       |                      |       |                      |       |

## References

- Amiri A, Torabi Parizi G, Kousha M, Saadat F, Modabbernia MJ, Najafi K, Atrkar Roushan Z (2013) Changes in plasma Brain-derived neurotrophic factor (BDNF) levels induced by methylphenidate in children with Attention deficit-hyperactivity disorder (ADHD) *Progress in neuro-psychopharmacology & biological psychiatry* 47:20-24 doi:10.1016/j.pnpbp.2013.07.018
- Arcos-Burgos M et al. (2010) A common variant of the latrophilin 3 gene, LPHN3, confers susceptibility to ADHD and predicts effectiveness of stimulant medication *Molecular psychiatry* 15:1053-1066 doi:10.1038/mp.2010.6
- Cheon KA, Cho DY, Koo MS, Song DH, Namkoong K (2009) Association between homozygosity of a G allele of the alpha-2a-adrenergic receptor gene and methylphenidate response in Korean children and adolescents with attention-deficit/hyperactivity disorder *Biological psychiatry* 65:564-570 doi:10.1016/j.biopsych.2008.12.003
- Cheon KA, Jun JY, Cho DY (2008) Association of the catechol-O-methyltransferase polymorphism with methylphenidate response in a classroom setting in children with attention-deficit hyperactivity disorder *International clinical psychopharmacology* 23:291-298 doi:10.1097/YIC.0b013e328306a977
- Cheon KA, Kim BN, Cho SC (2007) Association of 4-repeat allele of the dopamine D4 receptor gene exon III polymorphism and response to methylphenidate treatment in Korean ADHD children *Neuropsychopharmacology : official publication of the American College of Neuropsychopharmacology* 32:1377-1383 doi:10.1038/sj.npp.1301244
- Contini V et al. (2012) No significant association between genetic variants in 7 candidate genes and response to methylphenidate treatment in adult patients with ADHD *Journal of clinical psychopharmacology* 32:820-823 doi:10.1097/JCP.0b013e318270e727
- Contini V et al. (2011) Adrenergic alpha2A receptor gene is not associated with methylphenidate response in adults with ADHD *European archives of psychiatry and clinical neuroscience* 261:205-211 doi:10.1007/s00406-010-0172-4
- da Silva TL, Pianca TG, Roman T, Hutz MH, Faraone SV, Schmitz M, Rohde LA (2008) Adrenergic alpha2A receptor gene and response to methylphenidate in attention-deficit/hyperactivity disorder-predominantly inattentive type *Journal of neural transmission (Vienna, Austria : 1996)* 115:341-345 doi:10.1007/s00702-007-0835-0

- de Azeredo LA et al. (2014) Further evidence for the association between a polymorphism in the promoter region of SLC6A3/DAT1 and ADHD: findings from a sample of adults European archives of psychiatry and clinical neuroscience doi:10.1007/s00406-014-0486-8
- Froehlich TE et al. (2011) Pharmacogenetic predictors of methylphenidate dose-response in attention-deficit/hyperactivity disorder Journal of the American Academy of Child and Adolescent Psychiatry 50:1129-1139 e1122 doi:10.1016/j.jaac.2011.08.002
- Hamarman S, Fossella J, Ulger C, Brimacombe M, Dermody J (2004) Dopamine receptor 4 (DRD4) 7-repeat allele predicts methylphenidate dose response in children with attention deficit hyperactivity disorder: a pharmacogenetic study Journal of child and adolescent psychopharmacology 14:564-574 doi:10.1089/cap.2004.14.564
- Hong SB, Kim JW, Cho SC, Shin MS, Kim BN, Yoo HJ (2012) Dopaminergic and noradrenergic gene polymorphisms and response to methylphenidate in Korean children with attention-deficit/hyperactivity disorder: is there an interaction? Journal of child and adolescent psychopharmacology 22:343-352 doi:10.1089/cap.2011.0076
- Kambeitz J, Romanos M, Ettinger U (2014) Meta-analysis of the association between dopamine transporter genotype and response to methylphenidate treatment in ADHD The pharmacogenomics journal 14:77-84 doi:10.1038/tpj.2013.9
- Kereszturi E et al. (2008) Catechol-O-methyltransferase Val158Met polymorphism is associated with methylphenidate response in ADHD children American journal of medical genetics Part B, Neuropsychiatric genetics : the official publication of the International Society of Psychiatric Genetics 147B:1431-1435 doi:10.1002/ajmg.b.30704
- Kim BN et al. (2011) Val/Val genotype of brain-derived neurotrophic factor (BDNF) Val(6)(6)Met polymorphism is associated with a better response to OROS-MPH in Korean ADHD children The international journal of neuropsychopharmacology / official scientific journal of the Collegium Internationale Neuropsychopharmacologicum (CINP) 14:1399-1410 doi:10.1017/s146114571100099x
- Kim BN, Kim JW, Hong SB, Cho SC, Shin MS, Yoo HJ (2010) Possible association of norepinephrine transporter -3081(A/T) polymorphism with methylphenidate response in attention deficit hyperactivity disorder Behavioral and brain functions : BBF 6:57 doi:10.1186/1744-9081-6-57
- Labbe A, Liu A, Atherton J, Gizenko N, Fortier ME, Sengupta SM, Ridha J (2012) Refining psychiatric phenotypes for response to treatment: contribution of LPHN3 in ADHD American journal of medical genetics Part B, Neuropsychiatric genetics : the official publication of the International Society of Psychiatric Genetics 159B:776-785 doi:10.1002/ajmg.b.32083
- Licinio J, Dong C, Wong ML (2009) Novel sequence variations in the brain-derived neurotrophic factor gene and association with major depression and antidepressant treatment response Archives of general psychiatry 66:488-497 doi:10.1001/archgenpsychiatry.2009.38
- McGough J et al. (2006) Pharmacogenetics of methylphenidate response in preschoolers with ADHD Journal of the American Academy of Child and Adolescent Psychiatry 45:1314-1322 doi:10.1097/01.chi.0000235083.40285.08
- Mick E, Neale B, Middleton FA, McGough JJ, Faraone SV (2008) Genome-wide association study of response to methylphenidate in 187 children with attention-deficit/hyperactivity disorder American journal of medical genetics Part B, Neuropsychiatric genetics : the official publication of the International Society of Psychiatric Genetics 147B:1412-1418 doi:10.1002/ajmg.b.30865
- Pare G et al. (2013) Genetic determinants of dabigatran plasma levels and their relation to bleeding Circulation 127:1404-1412 doi:10.1161/circulationaha.112.001233
- Park S, Kim JW, Kim BN, Hong SB, Shin MS, Yoo HJ, Cho SC (2013) No significant association between the alpha-2A-adrenergic receptor gene and treatment response in combined or inattentive subtypes of attention-deficit hyperactivity disorder Pharmacopsychiatry 46:169-174 doi:10.1055/s-0033-1343485

- Sun Z et al. (2004) Methylphenidate is stereoselectively hydrolyzed by human carboxylesterase CES1A1 *The Journal of pharmacology and experimental therapeutics* 310:469-476 doi:10.1124/jpet.104.067116
- Tahir E, Yazgan Y, Cirakoglu B, Ozbay F, Waldman I, Asherson PJ (2000) Association and linkage of DRD4 and DRD5 with attention deficit hyperactivity disorder (ADHD) in a sample of Turkish children *Molecular psychiatry* 5:396-404
- Xu M et al. (2010) Pharmacogenetic effects of dopamine transporter gene polymorphisms on response to chlorpromazine and clozapine and on extrapyramidal syndrome in schizophrenia *Progress in neuro-psychopharmacology & biological psychiatry* 34:1026-1032 doi:10.1016/j.pnpbp.2010.05.017
